# Supplementary material for: Enhanced Oral Bioavailability of Resveratrol by Using Neutralized Eudragit E Solid Dispersion Prepared via Spray Drying
Source: PubMed Central journal article supplement (PMC7828062; doi:10.3390/antiox10010090), 2021-01-11
Supplement: antioxidants-10-00090-s001.pdf [file antioxidants-10-00090-s001.pdf]

# Enhanced Oral Bioavailability of Resveratrol by Using Neutralized Eudragit E Solid Dispersion Prepared via Spray Drying

Eun-Sol Ha <sup>1</sup>, Du Hyung Choi <sup>2</sup>, In-hwan Baek <sup>3</sup>, Heejun Park <sup>4</sup> and Min-Soo Kim <sup>1,\*</sup>

**Table S1.** Dissolution data (concentration,  $\mu\text{g/mL}$ ) of raw *trans*-resveratrol and solid dispersion powders produced using the spray drying process in pH 1.2 dissolution media.

| Solid dispersions<br>( <i>trans</i> -resveratrol/polymer ratio) | 0.167 h                     | 0.25 h          | 0.5 h           | 0.75 h          | 1 h             | 1.5 h           | 2 h             |
|-----------------------------------------------------------------|-----------------------------|-----------------|-----------------|-----------------|-----------------|-----------------|-----------------|
| HPC (25/75)                                                     | 14.9 $\pm$ 1.2 <sup>a</sup> | 18.5 $\pm$ 1.7  | 25.5 $\pm$ 0.5  | 30.6 $\pm$ 0.8  | 34.9 $\pm$ 1.3  | 41.9 $\pm$ 1.4  | 50.6 $\pm$ 1.5  |
| HPC (10/90)                                                     | 42.2 $\pm$ 1.6              | 49.7 $\pm$ 1.7  | 48.3 $\pm$ 0.5  | 50.4 $\pm$ 0.9  | 50.3 $\pm$ 1.3  | 52.2 $\pm$ 1.4  | 53.8 $\pm$ 1.5  |
| HPMC (25/75)                                                    | 14.6 $\pm$ 1.8              | 21.2 $\pm$ 1.4  | 32.7 $\pm$ 0.2  | 39.9 $\pm$ 0.9  | 47.1 $\pm$ 1.1  | 55.7 $\pm$ 1.3  | 61.9 $\pm$ 1.3  |
| HPMC (10/90)                                                    | 29.5 $\pm$ 1.7              | 36.9 $\pm$ 1.5  | 42.1 $\pm$ 0.5  | 46.9 $\pm$ 1.3  | 50.6 $\pm$ 1.2  | 56.1 $\pm$ 1.4  | 60.1 $\pm$ 1.3  |
| PVP K30 (25/75)                                                 | 18.9 $\pm$ 1.4              | 19.9 $\pm$ 1.4  | 22.5 $\pm$ 0.6  | 29.6 $\pm$ 1.5  | 33.2 $\pm$ 1.1  | 40.2 $\pm$ 1.3  | 42.4 $\pm$ 1.0  |
| PVP K30 (10/90)                                                 | 21.1 $\pm$ 1.2              | 23.8 $\pm$ 1.5  | 31.4 $\pm$ 0.8  | 35.2 $\pm$ 1.8  | 42.6 $\pm$ 1.1  | 49.2 $\pm$ 1.3  | 49.6 $\pm$ 0.9  |
| PVP VA64 (25/75)                                                | 13.8 $\pm$ 0.8              | 17.0 $\pm$ 1.3  | 23.1 $\pm$ 0.9  | 28.6 $\pm$ 1.9  | 32.9 $\pm$ 1.0  | 39.4 $\pm$ 1.2  | 42.4 $\pm$ 0.7  |
| PVP VA64 (10/90)                                                | 26.5 $\pm$ 1.1              | 31.6 $\pm$ 1.6  | 34.8 $\pm$ 0.8  | 37.9 $\pm$ 1.4  | 41.0 $\pm$ 1.2  | 45.0 $\pm$ 1.4  | 46.7 $\pm$ 1.2  |
| Eudragit E/HCl (25/75)                                          | 365.7 $\pm$ 6.0             | 349.3 $\pm$ 5.1 | 280.2 $\pm$ 4.4 | 238.6 $\pm$ 5.4 | 204.9 $\pm$ 5.2 | 185.4 $\pm$ 5.0 | 170.4 $\pm$ 3.5 |
| Eudragit E/HCl (10/90)                                          | 377.8 $\pm$ 4.7             | 398.8 $\pm$ 2.7 | 400.1 $\pm$ 3.0 | 400.3 $\pm$ 2.2 | 400.1 $\pm$ 2.3 | 401.1 $\pm$ 2.7 | 400.2 $\pm$ 2   |
| Raw <i>trans</i> -resveratrol                                   | 3.8 $\pm$ 0.2               | 7.9 $\pm$ 0.3   | 10.2 $\pm$ 0.5  | 13.4 $\pm$ 0.8  | 15.4 $\pm$ 1.1  | 20.4 $\pm$ 1.1  | 23.6 $\pm$ 1.3  |

<sup>a</sup>Mean  $\pm$  standard deviation (n=4).

**Table S2.** Dissolution data (concentration,  $\mu\text{g/mL}$ ) of raw *trans*-resveratrol and solid dispersion powders produced using the spray drying process in pH 6.8 dissolution media.

| <b>Solid dispersions<br/>(<i>trans</i>-resveratrol/polymer ratio)</b> | <b>0.167 h</b>              | <b>0.25 h</b>   | <b>0.5 h</b>    | <b>0.75 h</b>   | <b>1 h</b>      | <b>1.5 h</b>    | <b>2 h</b>      |
|-----------------------------------------------------------------------|-----------------------------|-----------------|-----------------|-----------------|-----------------|-----------------|-----------------|
| HPC (25/75)                                                           | 13.9 $\pm$ 1.6 <sup>a</sup> | 17.3 $\pm$ 1.7  | 23.6 $\pm$ 0.4  | 28.3 $\pm$ 0.9  | 34.9 $\pm$ 1.3  | 41.9 $\pm$ 1.4  | 46.5 $\pm$ 1.5  |
| HPC (10/90)                                                           | 41.3 $\pm$ 1.7              | 48.6 $\pm$ 1.7  | 47.2 $\pm$ 0.6  | 49.2 $\pm$ 1.2  | 49.1 $\pm$ 1.3  | 51.0 $\pm$ 1.5  | 52.5 $\pm$ 1.5  |
| HPMC (25/75)                                                          | 13.7 $\pm$ 1.7              | 19.7 $\pm$ 1.5  | 30.1 $\pm$ 0.4  | 36.7 $\pm$ 1.2  | 43.3 $\pm$ 1.1  | 51.1 $\pm$ 1.4  | 56.8 $\pm$ 1.3  |
| HPMC (10/90)                                                          | 29.1 $\pm$ 1.5              | 36.2 $\pm$ 1.6  | 41.2 $\pm$ 0.8  | 45.9 $\pm$ 1.6  | 49.5 $\pm$ 1.2  | 54.8 $\pm$ 1.5  | 58.7 $\pm$ 1.2  |
| PVP K30 (25/75)                                                       | 17.6 $\pm$ 1.1              | 18.5 $\pm$ 1.5  | 20.8 $\pm$ 0.8  | 27.3 $\pm$ 1.8  | 30.7 $\pm$ 1.1  | 37.0 $\pm$ 1.3  | 41.0 $\pm$ 0.9  |
| PVP K30 (10/90)                                                       | 20.9 $\pm$ 1.2              | 23.5 $\pm$ 1.6  | 30.8 $\pm$ 0.9  | 34.6 $\pm$ 1.7  | 41.7 $\pm$ 1.3  | 48.0 $\pm$ 1.5  | 48.5 $\pm$ 1.2  |
| PVP VA64 (25/75)                                                      | 13.0 $\pm$ 1.0              | 15.9 $\pm$ 1.6  | 21.4 $\pm$ 0.7  | 26.4 $\pm$ 1.4  | 30.4 $\pm$ 1.2  | 36.2 $\pm$ 1.4  | 41.0 $\pm$ 1.1  |
| PVP VA64 (10/90)                                                      | 26.1 $\pm$ 1.5              | 31.0 $\pm$ 1.7  | 34.2 $\pm$ 0.7  | 37.1 $\pm$ 1.4  | 40.2 $\pm$ 1.3  | 44.0 $\pm$ 1.5  | 45.7 $\pm$ 1.3  |
| Eudragit E/HCl (25/75)                                                | 23.6 $\pm$ 3.3              | 32.1 $\pm$ 2.8  | 47.6 $\pm$ 2.5  | 56.8 $\pm$ 3.0  | 62.5 $\pm$ 2.9  | 68.5 $\pm$ 2.7  | 71.1 $\pm$ 2.0  |
| Eudragit E/HCl (10/90)                                                | 336.1 $\pm$ 5.6             | 385.2 $\pm$ 4.3 | 399.8 $\pm$ 3.2 | 401.5 $\pm$ 2.1 | 401.6 $\pm$ 2.1 | 402.0 $\pm$ 2.0 | 402.0 $\pm$ 2.2 |
| Raw <i>trans</i> -resveratrol                                         | 5.6 $\pm$ 0.4               | 9.0 $\pm$ 0.5   | 12.4 $\pm$ 0.2  | 14.6 $\pm$ 0.6  | 17.2 $\pm$ 0.9  | 21.4 $\pm$ 1.1  | 24.7 $\pm$ 1.1  |

<sup>a</sup>Mean  $\pm$  standard deviation (n=4).**Table S3.** Dissolution data (concentration,  $\mu\text{g/mL}$ ) of raw *trans*-resveratrol and Eudragit E/HCl solid dispersion powders produced using the spray drying process in pH 1.2 dissolution media.

| <b>Solid dispersions<br/>(<i>trans</i>-resveratrol/polymer ratio)</b> | <b>0.167 h</b>               | <b>0.5 h</b>    | <b>1 h</b>      | <b>2 h</b>      | <b>4 h</b>      | <b>6 h</b>      | <b>8 h</b>      | <b>12 h</b>     | <b>24 h</b>     | <b>36 h</b>     | <b>48 h</b>     |
|-----------------------------------------------------------------------|------------------------------|-----------------|-----------------|-----------------|-----------------|-----------------|-----------------|-----------------|-----------------|-----------------|-----------------|
| Eudragit E/HCl (25/75)                                                | 365.7 $\pm$ 7.5 <sup>a</sup> | 280.2 $\pm$ 4.6 | 204.9 $\pm$ 6.5 | 170.4 $\pm$ 3.2 | 148.7 $\pm$ 4.5 | 141.7 $\pm$ 5.3 | 138.6 $\pm$ 3.3 | 135.6 $\pm$ 2.3 | 132.3 $\pm$ 3.4 | 131.9 $\pm$ 3.6 | 131.6 $\pm$ 3.5 |
| Eudragit E/HCl (20/80)                                                | 370.3 $\pm$ 7.1              | 281.0 $\pm$ 6.5 | 214.3 $\pm$ 5.7 | 184.4 $\pm$ 5.5 | 162.6 $\pm$ 4.2 | 154.6 $\pm$ 3.8 | 149.3 $\pm$ 3.2 | 147.6 $\pm$ 3.3 | 147.0 $\pm$ 3.2 | 145.8 $\pm$ 2.9 | 144.6 $\pm$ 3.0 |
| Eudragit E/HCl (15/85)                                                | 378.8 $\pm$ 8.6              | 331.5 $\pm$ 6.7 | 252.6 $\pm$ 7.6 | 221.9 $\pm$ 5.7 | 209.7 $\pm$ 7.2 | 203.2 $\pm$ 5.3 | 200.1 $\pm$ 5.3 | 198.6 $\pm$ 5.4 | 196.2 $\pm$ 5.2 | 195.1 $\pm$ 4.9 | 195.6 $\pm$ 4.7 |
| Eudragit E/HCl (10/90)                                                | 377.8 $\pm$ 6.9              | 400.1 $\pm$ 5.4 | 400.1 $\pm$ 4.2 | 400.2 $\pm$ 3.2 | 400.0 $\pm$ 2.3 | 400.0 $\pm$ 2.2 | 400.0 $\pm$ 2.6 | 400.0 $\pm$ 2.4 | 400.0 $\pm$ 2.5 | 400.0 $\pm$ 2.3 | 401.6 $\pm$ 3.2 |
| Raw <i>trans</i> -resveratrol                                         | 3.8 $\pm$ 0.4                | 10.2 $\pm$ 0.3  | 15.4 $\pm$ 0.5  | 23.6 $\pm$ 0.6  | 29.0 $\pm$ 0.7  | 31.6 $\pm$ 0.8  | 34.2 $\pm$ 0.9  | 36.9 $\pm$ 1.1  | 42.2 $\pm$ 1.2  | 43.6 $\pm$ 1.3  | 45.2 $\pm$ 1.6  |

<sup>a</sup>Mean  $\pm$  standard deviation (n=4).

**Table S4.** Dissolution data (concentration,  $\mu\text{g/mL}$ ) of raw *trans*-resveratrol and Eudragit E/HCl solid dispersion powders produced using the spray drying process in pH 6.8 dissolution media.

| <b>Solid dispersions<br/>(<i>trans</i>-resveratrol/polymer ratio)</b> | <b>0.167 h</b>              | <b>0.5 h</b>    | <b>1 h</b>      | <b>2 h</b>      | <b>4 h</b>      | <b>6 h</b>      | <b>8 h</b>      | <b>12 h</b>     | <b>24 h</b>     | <b>36 h</b>     | <b>48 h</b>     |
|-----------------------------------------------------------------------|-----------------------------|-----------------|-----------------|-----------------|-----------------|-----------------|-----------------|-----------------|-----------------|-----------------|-----------------|
| Eudragit E/HCl (25/75)                                                | 17.0 $\pm$ 4.1 <sup>a</sup> | 45.5 $\pm$ 2.5  | 62.5 $\pm$ 3.5  | 71.1 $\pm$ 1.8  | 77.2 $\pm$ 2.5  | 80.9 $\pm$ 2.9  | 82.3 $\pm$ 1.9  | 81.1 $\pm$ 1.3  | 82.8 $\pm$ 1.9  | 82.3 $\pm$ 2.0  | 81.1 $\pm$ 2.0  |
| Eudragit E/HCl (20/80)                                                | 57.2 $\pm$ 3.8              | 63.8 $\pm$ 3.5  | 70.7 $\pm$ 3.1  | 75.9 $\pm$ 3.0  | 82.6 $\pm$ 2.3  | 86.5 $\pm$ 2.1  | 86.4 $\pm$ 1.8  | 86.9 $\pm$ 1.9  | 87.1 $\pm$ 1.8  | 87.0 $\pm$ 1.6  | 87.5 $\pm$ 1.7  |
| Eudragit E/HCl (15/85)                                                | 40.1 $\pm$ 4.6              | 57.8 $\pm$ 3.6  | 83.9 $\pm$ 4.1  | 109.0 $\pm$ 3.1 | 121.4 $\pm$ 3.9 | 131.4 $\pm$ 2.9 | 129.9 $\pm$ 2.9 | 129.0 $\pm$ 3.0 | 128.6 $\pm$ 2.9 | 127.7 $\pm$ 2.7 | 123.0 $\pm$ 2.6 |
| Eudragit E/HCl (10/90)                                                | 336.1 $\pm$ 8.0             | 399.8 $\pm$ 6.9 | 401.6 $\pm$ 5.6 | 402.0 $\pm$ 5.4 | 401.5 $\pm$ 4.3 | 402.3 $\pm$ 3.4 | 403.1 $\pm$ 3.6 | 402.1 $\pm$ 3.8 | 401.9 $\pm$ 3.6 | 402.1 $\pm$ 3.5 | 402.0 $\pm$ 3.9 |
| Raw <i>trans</i> -resveratrol                                         | 4.0 $\pm$ 0.5               | 10.7 $\pm$ 0.3  | 16.1 $\pm$ 0.6  | 24.7 $\pm$ 0.9  | 30.3 $\pm$ 0.8  | 33.0 $\pm$ 1.1  | 35.8 $\pm$ 1.2  | 38.6 $\pm$ 1.3  | 44.2 $\pm$ 1.5  | 45.5 $\pm$ 1.6  | 47.3 $\pm$ 1.5  |

<sup>a</sup>Mean  $\pm$  standard deviation (n=4).
